# Supplementary material
Source: publisher figshare collection journal article supplement (https://rs.figshare.com/ndownloader/files/16387823)
Supplement: Supplementary file 1 [file 16387823]

| **Supplemental Table 1.**  *Parapysche elsis* H-fibroin amino acid composition | | |
| --- | --- | --- |
| **Residue** | **Number** | **Percent** |
| Ala (A) | 168 | 2.6 |
| Arg (R) | 652 | 10.2 |
| Asn (N) | 6 | 0.1 |
| Asp (D) | 225 | 3.5 |
| Cys (C) | 3 | 0.0 |
| Gln (Q) | 30 | 0.5 |
| Glu (E) | 164 | 2.6 |
| Gly (G) | 1542 | 24.1 |
| His (H) | 251 | 3.9 |
| Ile (I) | 380 | 5.9 |
| Leu (L) | 369 | 5.8 |
| Lys (K) | 99 | 1.5 |
| Met (M) | 3 | 0.0 |
| Phe (F) | 5 | 0.1 |
| Pro (P) | 501 | 7.8 |
| Ser (S) | 760 | 11.9 |
| Thr (T) | 232 | 3.6 |
| Trp (W) | 80 | 1.2 |
| Tyr (Y) | 400 | 6.2 |
| Val (V) | 541 | 8.4 |
